# Supplementary material for: Organisational factors and under-reporting of occupational injuries in Sweden: a population-based study using capture–recapture methodology
Source: HighWire-hosted journal article supplement (doi:10.1136/oemed-2020-107257), 2021-03-31
Supplement: oemed-2020-107257supp001_data_supplement.pdf [file oemed-2020-107257supp001_data_supplement.pdf]

## Supplementary material

| <b>Table S1.</b> Sectors of economic activity used in the sixth EWCS* |                                                                                                                                                                                                                                                                                                                                                                                                                                |
|-----------------------------------------------------------------------|--------------------------------------------------------------------------------------------------------------------------------------------------------------------------------------------------------------------------------------------------------------------------------------------------------------------------------------------------------------------------------------------------------------------------------|
| Economic Sector*                                                      | Corresponding NACE Rev.2 sectors                                                                                                                                                                                                                                                                                                                                                                                               |
| Agriculture                                                           | A. Agriculture, forestry and fishing                                                                                                                                                                                                                                                                                                                                                                                           |
| Industry                                                              | B. Mining and quarrying<br>C. Manufacturing<br>D. Electricity, gas, steam and air conditioning supply<br>E. Water supply; sewerage, waste management and remediation activities                                                                                                                                                                                                                                                |
| Construction                                                          | F. Construction                                                                                                                                                                                                                                                                                                                                                                                                                |
| Commerce and hospitality                                              | G. Wholesale and retail trade; repair of motor vehicles and motorcycles<br>I. Accommodation and food service activities                                                                                                                                                                                                                                                                                                        |
| Transport                                                             | H. Transportation and storage                                                                                                                                                                                                                                                                                                                                                                                                  |
| Financial services                                                    | K. Financial and insurance activities<br>L. Real estate activities                                                                                                                                                                                                                                                                                                                                                             |
| Public administration                                                 | O. Public administration and defence; compulsory social security                                                                                                                                                                                                                                                                                                                                                               |
| Education                                                             | P. Education                                                                                                                                                                                                                                                                                                                                                                                                                   |
| Health                                                                | Q. Human health and social work activities                                                                                                                                                                                                                                                                                                                                                                                     |
| Other services                                                        | J. Information and communication<br>M. Professional, scientific and technical activities<br>N. Administrative and support service activities<br>R. Arts, entertainment and recreation<br>S. Arts, entertainment and recreation<br>T. Activities of households as employers; undifferentiated goods- and services-producing activities of households for own use<br>U. Activities of extraterritorial organizations and bodies. |

\* Eurofund (European Foundation for the Improvement of Living and Working Conditions) (2017). Sixth European Working Conditions Survey – Overview report (2017 update). Luxembourg, Publications Office of the European Union.

| <b>Table S2. Capture-recapture estimates of underreporting non-fatal occupational injuries by injury organizational factors in Sweden,2013 *</b> |         |          |          |                  |                           |                         |                  |                  |
|--------------------------------------------------------------------------------------------------------------------------------------------------|---------|----------|----------|------------------|---------------------------|-------------------------|------------------|------------------|
| Variables                                                                                                                                        | Overlap | ISA only | AFA only | Total observed † | Total estimated ‡ (95%CI) | % Underreported (95%CI) | %captured by ISA | %captured by AFA |
| <i>Proportion of women in organization</i>                                                                                                       |         |          |          |                  |                           |                         |                  |                  |
| Male dominated (female <40%)                                                                                                                     | 13060   | 12601    | 4779     | 30440            | 35051 (34872-35230)       | 13,2 (12,8-13,5)        | 73,2             | 50,9             |
| Gender integrated (female 40-60%)                                                                                                                | 5085    | 4430     | 1317     | 10832            | 11979 (11902-12057)       | 9,6 (9,1-10,1)          | 79,4             | 53,4             |
| Female dominated (female >60%)                                                                                                                   | 12727   | 24018    | 5310     | 42055            | 52076 (51703-52449)       | 19,2 (18,8-19,7)        | 70,6             | 34,6             |
| <i>Proportion of young workers at the organization (&lt;30 years old)</i>                                                                        |         |          |          |                  |                           |                         |                  |                  |
| ≤10%                                                                                                                                             | 3636    | 4757     | 1244     | 9637             | 11265 (11147-11382)       | 14,4 (13,7-15,2)        | 74,5             | 43,3             |
| >10-<30%                                                                                                                                         | 22966   | 31337    | 7979     | 62282            | 73169 (72850-73488)       | 14,9 (14,6-15,2)        | 74,2             | 42,3             |
| ≥30%                                                                                                                                             | 4270    | 4955     | 2183     | 11408            | 13941 (13780-14102)       | 18,2 (17,4-18,9)        | 66,2             | 46,3             |
| <i>Proportion of immigrant workers in organization</i>                                                                                           |         |          |          |                  |                           |                         |                  |                  |
| <10%                                                                                                                                             | 14506   | 14356    | 4846     | 33708            | 38504 (38326-38681)       | 12,5 (12,1-12,8)        | 75,0             | 50,3             |
| 10-20                                                                                                                                            | 10324   | 16624    | 4109     | 31057            | 37673 (37390-37957)       | 17,6 (17,1-18,1)        | 71,5             | 38,3             |
| >20%                                                                                                                                             | 6042    | 10069    | 2451     | 18562            | 22647 (22431-22862)       | 18,0 (17,4-18,7)        | 71,1             | 37,5             |
| <i>Proportion of highly educated workers at the organization (Higher level education (&gt;13 years)</i>                                          |         |          |          |                  |                           |                         |                  |                  |
| <20%                                                                                                                                             | 7611    | 7260     | 3394     | 18265            | 21502 (21344-21661)       | 15,1 (14,5-15,6)        | 69,2             | 51,2             |
| ≥20-40%                                                                                                                                          | 8730    | 10128    | 2973     | 21831            | 25280 (25109-25451)       | 13,6 (13,1-14,1)        | 74,6             | 46,3             |
| ≥40-60%                                                                                                                                          | 9876    | 15865    | 3672     | 29413            | 35312 (35,75-35549)       | 16,7 (16,2-17,2)        | 72,9             | 38,4             |
| ≥60%                                                                                                                                             | 4655    | 7796     | 1367     | 13818            | 16107 (15944-16271)       | 14,2 (13,5-15,0)        | 77,3             | 37,4             |
| <i>Ownership Sector</i>                                                                                                                          |         |          |          |                  |                           |                         |                  |                  |
| Public                                                                                                                                           | 14726   | 16886    | 6282     | 45433            | 53101 (52827-53375)       | 14,4 (14,1-14,8)        | 75,9             | 40,1             |
| Private                                                                                                                                          | 16146   | 24163    | 5124     | 37894            | 45097 (44842-45353)       | 16,0 (15,6-16,4)        | 70,1             | 46,6             |
| <i>Employer size §</i>                                                                                                                           |         |          |          |                  |                           |                         |                  |                  |
| Medium-small (50-99)                                                                                                                             | 2046    | 2069     | 1141     | 5256             | 6410 (6308-6511)          | 18,0 (16,9-19,1)        | 64,2             | 49,7             |
| Medium-large (100-249)                                                                                                                           | 2693    | 2830     | 1321     | 6844             | 8232 (8122-8342)          | 16,9 (15,9-17,8)        | 67,1             | 48,8             |
| Large (≥250)                                                                                                                                     | 9987    | 11987    | 3820     | 25794            | 30379 (30185-30573)       | 15,1 (14,6-15,6)        | 72,3             | 45,4             |
| <i>Economic activity</i>                                                                                                                         |         |          |          |                  |                           |                         |                  |                  |
| Agriculture                                                                                                                                      | 44      | 40       | 31       | 115              | 143 (126-161)             | 19,7 (12,0-27,4)        | 58,7             | 52,4             |
| Other services                                                                                                                                   | 2608    | 3710     | 1277     | 7595             | 9412 (9274-9550)          | 19,3 (18,3-20,3)        | 67,1             | 41,3             |
| Commerce and hospitality                                                                                                                         | 2255    | 2330     | 1353     | 5938             | 7336 (7221-7451)          | 19,1 (18,0-20,1)        | 62,5             | 49,2             |
| Education                                                                                                                                        | 3125    | 4073     | 1509     | 8707             | 10674 (10533-10815)       | 18,4 (17,5-19,3)        | 67,4             | 43,3             |
| Health                                                                                                                                           | 6932    | 16326    | 2455     | 25713            | 31495 (31221-31769)       | 18,4 (17,8-18,9)        | 73,8             | 29,8             |
| Construction                                                                                                                                     | 1875    | 1427     | 927      | 4229             | 4934 (4868-5001)          | 14,3 (13,3-15,3)        | 66,9             | 56,8             |

|                       |      |      |      |       |                     |                  |      |      |
|-----------------------|------|------|------|-------|---------------------|------------------|------|------|
| Financial services    | 514  | 435  | 206  | 1155  | 1329 (1295-1364)    | 13,1 (11,2-15,1) | 71,4 | 54,2 |
| Transport             | 2630 | 2283 | 942  | 5855  | 6673 (6600-6746)    | 12,3 (11,4-13,1) | 73,6 | 53,5 |
| Industry              | 7228 | 7284 | 2055 | 16567 | 18638 (18524-18752) | 11,1 (10,6-11,6) | 77,9 | 49,8 |
| Public administration | 3478 | 2807 | 587  | 6872  | 7346 (7299-7392)    | 6,5 (5,9-7,0)    | 85,6 | 55,3 |
| Missing               | 183  | 334  | 64   | 581   | -                   | -                | -    | -    |

\* Including working population in the entire public sector and medium and large companies in the private sector (≥50 employees).  
† Total observed corresponds to the sum of occupational injuries captured by ISA only, AFA only and the overlap.  
‡ Total estimated is the sum of the injuries observed plus those not captured by any of the sources.  
§ Employer size available only for private companies  
ISA= the Information System on occupational injuries. AFA= AFA Insurance.

**Table S3.** Capture-recapture estimates of underreported non-fatal occupational injuries in Sweden, stratified by severity levels, 2013. \*

|                                                                                                         | No healthcare contact |                           |                         | Only out-patient |                           |                         | Hospitalized     |                          |                         |
|---------------------------------------------------------------------------------------------------------|-----------------------|---------------------------|-------------------------|------------------|---------------------------|-------------------------|------------------|--------------------------|-------------------------|
|                                                                                                         | Total observed †      | Total estimated ‡ (95%CI) | % Underreported (95%CI) | Total observed † | Total estimated ‡ (95%CI) | % Underreported (95%CI) | Total observed † | Total estimated‡ (95%CI) | % Underreported (95%CI) |
| <b>Total</b>                                                                                            | 69663                 | 83991 (83607-84376)       | 17,1 (16,7-17,4)        | 12295            | 13409 (13344-13475)       | 8,3 (7,9-8,7)           | 1369             | 1422 (1412-1432)         | 3,7 (3,0-4,4)           |
| <i>Proportion of women in organization</i>                                                              |                       |                           |                         |                  |                           |                         |                  |                          |                         |
| Male dominated (female <40%)                                                                            | 23403                 | 27676 (27487-27864)       | 15,4 (15,0-15,9)        | 6264             | 6778 (6738-6818)          | 7,6 (7,1-8,1)           | 773              | 793 (788-799)            | 2,3 (1,9-3,3)           |
| Gender integrated (female 40-60%)                                                                       | 8917                  | 9942 (9865-10018)         | 10,3 (9,7-10,9)         | 1743             | 1855 (1837-1873)          | 6,0 (5,2-6,9)           | 172              | 184 (178-190)            | 6,5 (3,6-9,4)           |
| Female dominated (female >60%)                                                                          | 37343                 | 46866 (46491-47241)       | 20,3 (19,8-20,8)        | 4288             | 4794 (4747-4840)          | 10,5 (9,8-11,3)         | 424              | 448 (440-456)            | 5,3 (3,7-6,9)           |
| <i>Proportion of young workers at the organization (&lt;30 years old)</i>                               |                       |                           |                         |                  |                           |                         |                  |                          |                         |
| ≤10%                                                                                                    | 7868                  | 9388 (9260-9517)          | 16,2 (15,2-17,2)        | 1549             | 1682 (1661-1704)          | 7,9 (6,8-9,0)           | 220              | 229 (224-233)            | 3,7 (2,0-5,5)           |
| >10-<30%                                                                                                | 52846                 | 63192 (62859-63525)       | 16,4 (16,0-16,7)        | 8496             | 9217 (9167-9268)          | 7,8 (7,4-8,3)           | 940              | 970 (962-977)            | 3,1 (2,3-3,8)           |
| ≥30%                                                                                                    | 8949                  | 11298 (11126-11470)       | 20,8 (19,8-21,7)        | 2250             | 2516 (2482-2550)          | 10,6 (9,5-11,7)         | 209              | 226 (218-234)            | 7,5 (4,6-10,4)          |
| <i>Proportion of immigrant workers in organization</i>                                                  |                       |                           |                         |                  |                           |                         |                  |                          |                         |
| <10%                                                                                                    | 27538                 | 31902 (31716-32088)       | 13,7 (13,2-14,1)        | 5510             | 5961 (5922-6000)          | 7,6 (7,0-8,1)           | 660              | 681 (675-688)            | 3,1 (2,3-4,0)           |
| 10-20                                                                                                   | 26481                 | 32907 (32593-33220)       | 19,5 (18,9-20,1)        | 4139             | 4534 (4493-4575)          | 8,7 (8,0-9,5)           | 437              | 456 (450-463)            | 4,2 (2,9-5,5)           |
| >20%                                                                                                    | 15644                 | 19575 (19323-19827)       | 20,1 (19,3-20,9)        | 2646             | 2917 (2884-2950)          | 9,3 (8,4-10,2)          | 272              | 285 (279-290)            | 4,5 (2,8-6,2)           |
| <i>Proportion of highly educated workers at the organization (Higher level education (&gt;13 years)</i> |                       |                           |                         |                  |                           |                         |                  |                          |                         |
| <20%                                                                                                    | 13650                 | 16750 (16570-16931)       | 18,5 (17,8-19,2)        | 4113             | 4476 (4440-4511)          | 8,1 (7,4-8,8)           | 502              | 514 (510-518)            | 2,3 (1,5-3,1)           |
| ≥20-40%                                                                                                 | 18192                 | 21409 (21242-21577)       | 15,0 (14,5-15,6)        | 3275             | 3543 (3513-3572)          | 7,6 (6,8-8,3)           | 364              | 376 (371-381)            | 3,3 (2,1-4,5)           |
| ≥40-60%                                                                                                 | 25882                 | 31492 (31237-31748)       | 17,8 (17,3-18,4)        | 3177             | 3492 (3458-3527)          | 9,0 (8,2-9,8)           | 354              | 371 (365-377)            | 4,7 (3,2-6,1)           |

|                                                                                                                                                                                                                                                                                                                                                                                                                                                                              |       |                     |                  |      |                  |                  |     |               |                 |
|------------------------------------------------------------------------------------------------------------------------------------------------------------------------------------------------------------------------------------------------------------------------------------------------------------------------------------------------------------------------------------------------------------------------------------------------------------------------------|-------|---------------------|------------------|------|------------------|------------------|-----|---------------|-----------------|
| ≥60%                                                                                                                                                                                                                                                                                                                                                                                                                                                                         | 11939 | 14061 (13910-14212) | 15,1 (14,3-15,9) | 1730 | 1888 (1862-1913) | 8,4 (7,2-9,5)    | 149 | 166 (157-175) | 10,1 (5,7-14,5) |
| <i>Ownership Sector</i>                                                                                                                                                                                                                                                                                                                                                                                                                                                      |       |                     |                  |      |                  |                  |     |               |                 |
| Public                                                                                                                                                                                                                                                                                                                                                                                                                                                                       | 39970 | 47200 (46893-47507) | 15,3 (14,9-15,8) | 4933 | 5359 (5318-5399) | 7,9 (7,3-8,6)    | 530 | 557 (549-564) | 4,8 (3,5-6,0)   |
| Private                                                                                                                                                                                                                                                                                                                                                                                                                                                                      | 29693 | 36571 (36306-36836) | 18,8 (18,3-19,3) | 7362 | 8049 (8000-8098) | 8,5 (8,0-9,0)    | 839 | 866 (859-873) | 3,1 (2,4-3,9)   |
| <i>Employer size §</i>                                                                                                                                                                                                                                                                                                                                                                                                                                                       |       |                     |                  |      |                  |                  |     |               |                 |
| Medium-small (50-99)                                                                                                                                                                                                                                                                                                                                                                                                                                                         | 3725  | 4849 (4737-4961)    | 23,2 (21,8-24,5) | 1365 | 1509 (1483-1534) | 9,5 (8,2-10,9)   | 166 | 174 (169-179) | 4,8 (2,2-7,4)   |
| Medium-large (100-249)                                                                                                                                                                                                                                                                                                                                                                                                                                                       | 5088  | 6401 (6277-6525)    | 20,5 (19,3-21,7) | 1554 | 1724 (1697-1752) | 9,9 (8,6-11,2)   | 202 | 207 (205-210) | 2,6 (1,3-4,0)   |
| Large (≥250)                                                                                                                                                                                                                                                                                                                                                                                                                                                                 | 20880 | 25274 (25062-25486) | 17,4 (16,8-18,0) | 4443 | 4819 (4783-4855) | 7,8 (7,2-8,4)    | 471 | 485 (480-490) | 2,9 (2,0-3,8)   |
| <i>Economic activity</i>                                                                                                                                                                                                                                                                                                                                                                                                                                                     |       |                     |                  |      |                  |                  |     |               |                 |
| Agriculture                                                                                                                                                                                                                                                                                                                                                                                                                                                                  | 81    | 104 (87-121)        | 22,1 (12,6-31,7) | 30   | NE               | NE               | 4   | NE            | NE              |
| Other services                                                                                                                                                                                                                                                                                                                                                                                                                                                               | 6000  | 7754 (7585-7922)    | 22,6 (21,3-23,9) | 1433 | 1593 (1566-1620) | 10,0 (8,7-11,4)  | 162 | 172 (167-177) | 5,7             |
| Commerce and hospitality                                                                                                                                                                                                                                                                                                                                                                                                                                                     | 4552  | 5805 (681-5930)     | 21,6 (20,3-22,9) | 1269 | 1448 (1417-1478) | 12,3 (10,7-14,0) | 117 | 126 (120-131) | 7,1 (3,4-10,9)  |
| Education                                                                                                                                                                                                                                                                                                                                                                                                                                                                    | 7318  | 9190 (9040-9341)    | 20,4 (19,3-21,4) | 1245 | 1373 (1349-1397) | 9,3 (7,9-10,8)   | 144 | 152 (147-156) | 5,0 (2,4-7,7)   |
| Health                                                                                                                                                                                                                                                                                                                                                                                                                                                                       | 23712 | 29243 (28929-29557) | 18,9 (18,2-19,6) | 1833 | 2054 (2022-2085) | 10,8 (9,5-12,0)  | 168 | 179 (173-185) | 6,0 (3,1-8,8)   |
| Construction                                                                                                                                                                                                                                                                                                                                                                                                                                                                 | 2836  | 3489 (3410-3569)    | 18,7 (17,2-20,2) | 1247 | 1362 (1342-1382) | 8,4 (7,2-9,7)    | 146 | 150 (147-152) | 2,5 (0,9-4,1)   |
| Financial services                                                                                                                                                                                                                                                                                                                                                                                                                                                           | 902   | 1051 (1017-1086)    | 14,2 (11,8-16,6) | 222  | 249 (238-259)    | 10,7 (7,2-14,1)  | 31  | NE            | NE              |
| Transport                                                                                                                                                                                                                                                                                                                                                                                                                                                                    | 4720  | 5455 (5386-5525)    | 13,5 (12,5-14,4) | 1014 | 1104 (1086-1121) | 8,1 (6,8-9,5)    | 121 | 126 (123-130) | 4,3 (1,8-6,8)   |
| Industry                                                                                                                                                                                                                                                                                                                                                                                                                                                                     | 13310 | 15304 (15173-15435) | 13,0 (12,4-13,7) | 2898 | 3067 (3046-3089) | 5,5 (4,9-6,1)    | 359 | 363 (361-365) | 1,2 (0,6-1,8)   |
| Public administration                                                                                                                                                                                                                                                                                                                                                                                                                                                        | 5737  | 6156 (6109-6203)    | 6,8 (6,1-7,5)    | 1028 | 1074 (1063-1084) | 4,3 (3,3-5,2)    | 107 | 115 (110-120) | 6,8 (3,3-10,4)  |
| Missing                                                                                                                                                                                                                                                                                                                                                                                                                                                                      | 495   | -                   | -                | 76   | -                | -                | 10  | -             | -               |
| <p>* Including working population in the entire public sector and medium and large companies in the private sector (≥50 employees).<br/> † Total observed corresponds to the sum of occupational injuries captured by ISA only, AFA only and the overlap.<br/> ‡ Total estimated is the sum of the injuries observed plus those not captured by any of the sources.<br/> § Employer size available only for private companies<br/> NE= No estimation due to low numbers.</p> |       |                     |                  |      |                  |                  |     |               |                 |

| <b>Table S4. Adjusted capture-recapture estimates of underreporting non-fatal occupational injuries by economic activity in Sweden, 2013*</b>                                                                                                                                                                                                                                                                                                                                                                                                                                                                                                                                                                                                                                                     |                              |                     |                  |                   |                   |                  |                     |                   |                 |
|---------------------------------------------------------------------------------------------------------------------------------------------------------------------------------------------------------------------------------------------------------------------------------------------------------------------------------------------------------------------------------------------------------------------------------------------------------------------------------------------------------------------------------------------------------------------------------------------------------------------------------------------------------------------------------------------------------------------------------------------------------------------------------------------------|------------------------------|---------------------|------------------|-------------------|-------------------|------------------|---------------------|-------------------|-----------------|
|                                                                                                                                                                                                                                                                                                                                                                                                                                                                                                                                                                                                                                                                                                                                                                                                   | <b>No healthcare contact</b> |                     |                  | <b>Outpatient</b> |                   |                  | <b>Hospitalized</b> |                   |                 |
|                                                                                                                                                                                                                                                                                                                                                                                                                                                                                                                                                                                                                                                                                                                                                                                                   | Total observed †             | Total estimated ‡   | % Underreported  | Total observed †  | Total estimated ‡ | % Underreported  | Total observed †    | Total estimated ‡ | % Underreported |
| <i>Economic activity</i>                                                                                                                                                                                                                                                                                                                                                                                                                                                                                                                                                                                                                                                                                                                                                                          |                              |                     |                  |                   |                   |                  |                     |                   |                 |
| Agriculture                                                                                                                                                                                                                                                                                                                                                                                                                                                                                                                                                                                                                                                                                                                                                                                       | 81                           | NE                  | NE               | 30                | NE                | NE               | 4                   | NE                | NE              |
| Other services                                                                                                                                                                                                                                                                                                                                                                                                                                                                                                                                                                                                                                                                                                                                                                                    | 6000                         | 7775 (7601-7949)    | 22,7 (21,4-24,0) | 1433              | 1592 (1565-1619)  | 10,0 (8,6-11,4)  | 162                 | 172 (166-178)     | 5,7 (2,9-8,5)   |
| Commerce and hospitality                                                                                                                                                                                                                                                                                                                                                                                                                                                                                                                                                                                                                                                                                                                                                                          | 4552                         | 5811 (5684-5939)    | 21,5 (20,2-22,8) | 1269              | 1447 (1417-1478)  | 12,3 (10,7-13,9) | 117                 | 126 (112-140)     | 7,1 (3,2-11,0)  |
| Education                                                                                                                                                                                                                                                                                                                                                                                                                                                                                                                                                                                                                                                                                                                                                                                         | 7318                         | 9185 (9027-9343)    | 20,3 (19,2-21,3) | 1245              | 1373 (1348-1398)  | 9,3 (7,8-10,8)   | 144                 | 152 (147-157)     | 5,1 (2,3-7,9)   |
| Health                                                                                                                                                                                                                                                                                                                                                                                                                                                                                                                                                                                                                                                                                                                                                                                            | 23712                        | 29298 (28984-29613) | 19,0 (18,3-19,7) | 1833              | 2053 (2021-2085)  | 10,6 (9,3-11,9)  | 168                 | 178 (172-184)     | 5,6 (2,8-8,4)   |
| Construction                                                                                                                                                                                                                                                                                                                                                                                                                                                                                                                                                                                                                                                                                                                                                                                      | 2836                         | 3492 (3409-3575)    | 18,6 (17,1-20,1) | 1247              | 1362 (1342-1382)  | 8,4 (7,2-9,7)    | 146                 | 150 (147-152)     | 2,5 (0,8-4,0)   |
| Financial services                                                                                                                                                                                                                                                                                                                                                                                                                                                                                                                                                                                                                                                                                                                                                                                | 902                          | 1052 (1016-1089)    | 14,1 (11,7-16,6) | 222               | 247 (236-257)     | 9,9 (6,4-13,4)   | 31                  | NE                | NE              |
| Transport                                                                                                                                                                                                                                                                                                                                                                                                                                                                                                                                                                                                                                                                                                                                                                                         | 4720                         | 5475 (5393-5556)    | 13,6 (12,6-14,6) | 1014              | 1103 (1086-1121)  | 8,2 (6,8-9,4)    | 121                 | 126 (122-130)     | 4,0 (1,5-6,5)   |
| Industry                                                                                                                                                                                                                                                                                                                                                                                                                                                                                                                                                                                                                                                                                                                                                                                          | 13310                        | 15354 (15206-15503) | 13,2 (12,5-13,9) | 2898              | 3068 (3046-3089)  | 5,5 (4,9-6,1)    | 359                 | 363 (361-366)     | 1,2 (0,6-1,8)   |
| Public administration                                                                                                                                                                                                                                                                                                                                                                                                                                                                                                                                                                                                                                                                                                                                                                             | 5737                         | 6439 (6332-6545)    | 9,9 (8,9-10,9)   | 1028              | 1081 (1065-1098)  | 4,7 (3,6-5,9)    | 107                 | 116 (107-125)     | 7,3 (3,0-11,6)  |
| Missing                                                                                                                                                                                                                                                                                                                                                                                                                                                                                                                                                                                                                                                                                                                                                                                           | 495                          | -                   | -                | 76                | -                 | -                | 10                  | -                 | -               |
| <p>* Including all working population in the entire public sector and medium and large companies in the private sector (≥50 employees). Adjusted by proportion of women, proportion of young employees (&lt;30 years old) and proportion of immigrants at the organization level. Estimates for agriculture could not be obtained in adjusted models due to small numbers.</p> <p>† Total observed corresponds to the sum of occupational injuries captured by ISA only, AFA only and the overlap.</p> <p>‡ Total estimated is the sum of the injuries observed plus those not captured by any of the sources. Adjusted by proportion of women, proportion of young workers (&lt;30 years old) and proportion of immigrants in the organization.</p> <p>NE= No estimation due to low numbers.</p> |                              |                     |                  |                   |                   |                  |                     |                   |                 |

| <b>Table S5:</b> Distribution of non-fatal occupational injuries by company/organization factors sorted by data source, Sweden, 2013.*                                                                                                                                                 |                                   |                |                       |                |                       |
|----------------------------------------------------------------------------------------------------------------------------------------------------------------------------------------------------------------------------------------------------------------------------------------|-----------------------------------|----------------|-----------------------|----------------|-----------------------|
|                                                                                                                                                                                                                                                                                        | <b>Total observed<sup>†</sup></b> | <b>ISA all</b> | <b>Present in ISA</b> | <b>AFA all</b> | <b>Present in AFA</b> |
|                                                                                                                                                                                                                                                                                        | <b>N (%)</b>                      | <b>N (%)</b>   | <b>%</b>              | <b>N (%)</b>   | <b>%</b>              |
| <b>TOTAL</b>                                                                                                                                                                                                                                                                           | 99614                             | 83074          | 83,4                  | 52814          | 53,0                  |
| <i>Proportion of women in organization</i>                                                                                                                                                                                                                                             |                                   |                |                       |                |                       |
| Male dominated (female <40%)                                                                                                                                                                                                                                                           | 42344                             | 33780          | 79,8                  | 25813          | 61,0                  |
| Gender neutral (female 40-60%)                                                                                                                                                                                                                                                         | 12397                             | 10592          | 85,4                  | 7333           | 59,2                  |
| Female dominated (female >60%)                                                                                                                                                                                                                                                         | 44873                             | 38702          | 86,3                  | 19668          | 43,8                  |
| <i>Proportion of young workers at the organization (&lt;30 years old)</i>                                                                                                                                                                                                              |                                   |                |                       |                |                       |
| ≤10%                                                                                                                                                                                                                                                                                   | 13691                             | 11198          | 81,8                  | 7438           | 54,3                  |
| >10-<30%                                                                                                                                                                                                                                                                               | 68153                             | 58447          | 85,8                  | 34776          | 51,0                  |
| ≥30%                                                                                                                                                                                                                                                                                   | 17770                             | 13429          | 75,6                  | 10600          | 59,7                  |
| <i>Proportion of immigrant workers in organization</i>                                                                                                                                                                                                                                 |                                   |                |                       |                |                       |
| <10%                                                                                                                                                                                                                                                                                   | 43623                             | 35607          | 81,6                  | 25820          | 59,2                  |
| 10-20                                                                                                                                                                                                                                                                                  | 34118                             | 29134          | 85,4                  | 16357          | 47,9                  |
| >20%                                                                                                                                                                                                                                                                                   | 21873                             | 18333          | 83,8                  | 10637          | 48,6                  |
| <i>Proportion with higher level education (&gt;13 years) in organization</i>                                                                                                                                                                                                           |                                   |                |                       |                |                       |
| <20%                                                                                                                                                                                                                                                                                   | 29292                             | 22285          | 76,1                  | 18452          | 63,0                  |
| ≥20-40%                                                                                                                                                                                                                                                                                | 24839                             | 20989          | 84,5                  | 13556          | 54,6                  |
| ≥40-60%                                                                                                                                                                                                                                                                                | 30580                             | 26572          | 86,9                  | 14217          | 46,5                  |
| ≥60%                                                                                                                                                                                                                                                                                   | 14903                             | 13228          | 88,8                  | 6589           | 44,2                  |
| <i>Ownership Sector</i>                                                                                                                                                                                                                                                                |                                   |                |                       |                |                       |
| Public ‡                                                                                                                                                                                                                                                                               | 45433                             | 40309          | 88,7                  | 21270          | 46,8                  |
| Private                                                                                                                                                                                                                                                                                | 54181                             | 42765          | 78,9                  | 31544          | 58,2                  |
| <i>Employer size §</i>                                                                                                                                                                                                                                                                 |                                   |                |                       |                |                       |
| Micro (1-9)                                                                                                                                                                                                                                                                            | 5540                              | 3545           | 64,0                  | 3664           | 66,1                  |
| Small (10-49)                                                                                                                                                                                                                                                                          | 10 747                            | 7608           | 70,8                  | 6872           | 63,9                  |
| Medium-small (50-99)                                                                                                                                                                                                                                                                   | 5256                              | 4115           | 78,3                  | 3187           | 60,6                  |
| Medium-large (100-249)                                                                                                                                                                                                                                                                 | 6844                              | 5523           | 80,7                  | 4014           | 58,6                  |
| Large (≥250)                                                                                                                                                                                                                                                                           | 25794                             | 21974          | 85,2                  | 13807          | 43,8                  |
| <i>Economic Activity</i>                                                                                                                                                                                                                                                               |                                   |                |                       |                |                       |
| Agriculture                                                                                                                                                                                                                                                                            | 735                               | 531            | 72,2                  | 428            | 58,2                  |
| Industry                                                                                                                                                                                                                                                                               | 19696                             | 16807          | 85,3                  | 11382          | 57,8                  |
| Construction                                                                                                                                                                                                                                                                           | 8434                              | 6099           | 72,3                  | 5753           | 68,2                  |
| Commerce and hospitality                                                                                                                                                                                                                                                               | 8937                              | 6457           | 72,3                  | 5611           | 62,8                  |
| Transport                                                                                                                                                                                                                                                                              | 7212                              | 5803           | 80,5                  | 4476           | 62,1                  |
| Financial services                                                                                                                                                                                                                                                                     | 1438                              | 1129           | 78,5                  | 908            | 63,1                  |
| Public administration                                                                                                                                                                                                                                                                  | 6875                              | 6288           | 91,5                  | 4068           | 59,2                  |
| Education                                                                                                                                                                                                                                                                              | 9199                              | 7553           | 82,1                  | 4918           | 53,5                  |
| Health                                                                                                                                                                                                                                                                                 | 26368                             | 23780          | 90,2                  | 9671           | 36,7                  |
| Other services                                                                                                                                                                                                                                                                         | 10061                             | 8058           | 80,1                  | 5307           | 52,8                  |
| Missing                                                                                                                                                                                                                                                                                | 659                               | 569            | 86,3                  | 292            | 44,3                  |
| *Includes OI among all public- and private-sector organizations in Sweden for the year 2013. Injuries missing information on ownership sector were early removed (3,8% for the total OI)                                                                                               |                                   |                |                       |                |                       |
| † Total observed corresponds to the sum of occupational injuries captured by ISA only, AFA only and the overlap. A total of 83 074 and 52 814 non-fatal OI were identified in ISA and AFA, respectively. After the merge on +/- 7 days, a dataset with 99 614 distinct OI was created. |                                   |                |                       |                |                       |
| ‡ Public-sector is composed of municipal and government administration; municipal- and government-owned companies and organizations; and other public institutions.                                                                                                                    |                                   |                |                       |                |                       |
| § Number of employees is provided only for companies in the private sector.                                                                                                                                                                                                            |                                   |                |                       |                |                       |
| ISA= the Information System on occupational injuries. AFA= AFA Insurance.                                                                                                                                                                                                              |                                   |                |                       |                |                       |
